# Supplementary material for: Combining Normal/Reversed-Phase HPTLC with Univariate Calibration for the Piperine Quantification with Traditional and Ultrasound-Assisted Extracts of Various Food Spices of Piper nigrum L. under Green Analytical Chemistry Viewpoint
Source: PubMed Central journal article supplement (PMC7866824; doi:10.3390/molecules26030732), 2021-01-31
Supplement: molecules-26-00732-s001.pdf [file molecules-26-00732-s001.pdf]

## Supplementary Materials

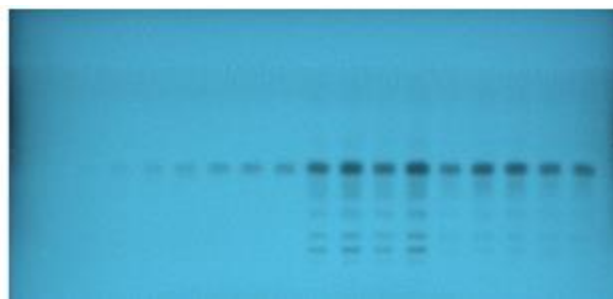

**Figure S1.** Pictorial diagram for thin-layer chromatography (TLC) plates of piperine (PPN) using sustainable reversed-phase HPTLC.

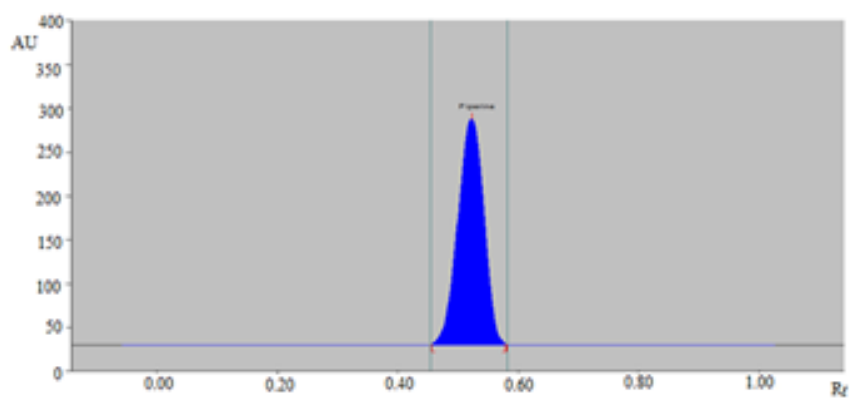

**Figure S2.** Densitometry chromatograms of standard PPN recorded using reversed-phase HPTLC.

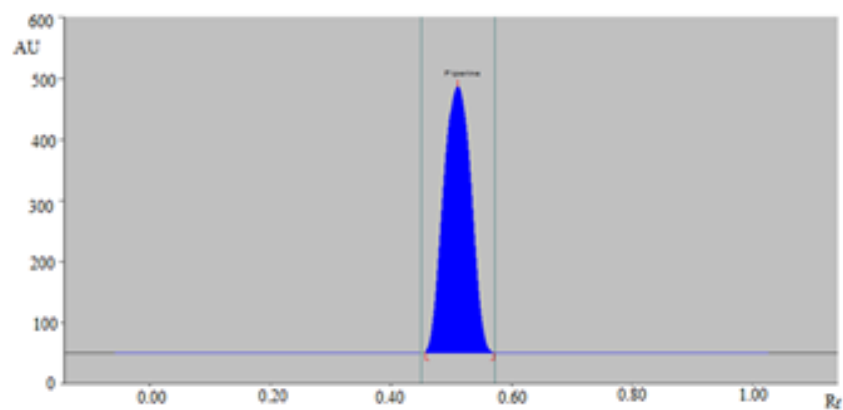

**Figure S3.** Densitometry chromatogram of PPN in methanolic extract of black pepper (BPMH) recorded using reversed-phase HPTLC technique.

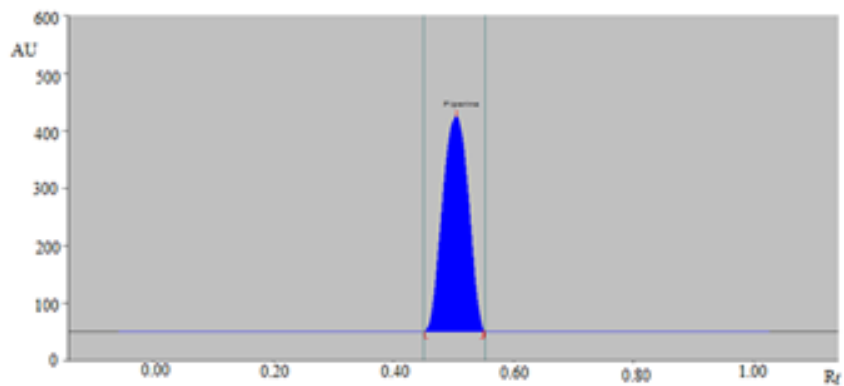

**Figure S4.** Densitometry chromatograms of PPN in methanolic extract of black pepper (BPPA) recorded using reversed-phase HPTLC technique.

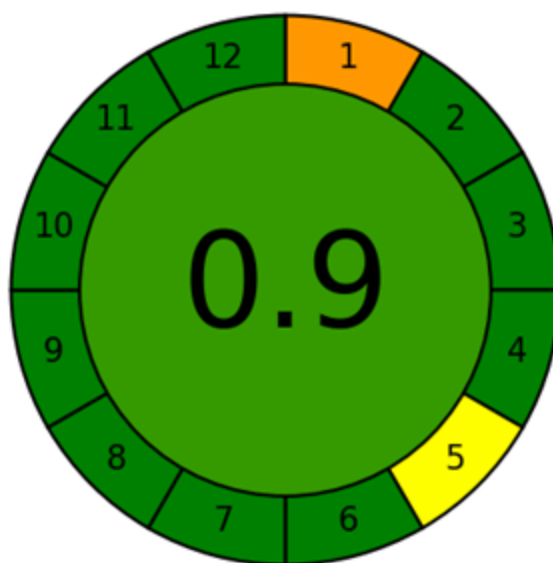

**Figure S5.** Eco-scale value of sustainable reversed-phase HPTLC technique predicted using AGREE: The Analytical Greenness Calculator.

**Table S1.** Results of least square regression analysis for piperine (PPN) for a sustainable reversed-phase high-performance thin-layer chromatography (HPTLC) technique (mean  $\pm$  SD; n = 6).

| Parameters                               | Reversed-phase HPTLC |
|------------------------------------------|----------------------|
| Linearity range (ng band <sup>-1</sup> ) | 50-500               |
| Regression equation                      | y = 43.27x + 522.19  |
| R <sup>2</sup>                           | 0.9990               |
| Slope $\pm$ SD                           | 43.27 $\pm$ 1.11     |
| Intercept $\pm$ SD                       | 522.19 $\pm$ 4.28    |
| Standard error of slope                  | 0.45                 |
| Standard error of intercept              | 1.74                 |
| 95% confidence interval of slope         | 38.49-48.04          |
| 95% confidence interval of intercept     | 503.77-540.60        |
| LOD $\pm$ SD (ng band <sup>-1</sup> )    | 17.10 $\pm$ 0.82     |
| LOQ $\pm$ SD (ng band <sup>-1</sup> )    | 51.30 $\pm$ 2.46     |

**Table S2.** Results of accuracy evaluation for reversed-phase HPTLC technique (mean  $\pm$  SD; n = 6).

| Conc. (ng band <sup>-1</sup> ) | Conc. found (ng band <sup>-1</sup> ) $\pm$ SD | Recovery (%) | RSD (%) |
|--------------------------------|-----------------------------------------------|--------------|---------|
| 50                             | 50.92 $\pm$ 0.76                              | 101.84       | 1.49    |
| 300                            | 302.84 $\pm$ 2.23                             | 100.94       | 0.73    |
| 500                            | 494.14 $\pm$ 2.95                             | 98.82        | 0.59    |

**Table S3.** Results of precision evaluation for reversed-phase HPTLC technique (mean  $\pm$  SD; n = 6).

| Conc. (ng band <sup>-1</sup> ) | Intraday precision |                |         | Interday precision |                |         |
|--------------------------------|--------------------|----------------|---------|--------------------|----------------|---------|
|                                | Area $\pm$ SD      | Standard error | RSD (%) | Area $\pm$ SD      | Standard error | RSD (%) |
| 50                             | 2668 $\pm$ 32      | 13.06          | 1.19    | 2578 $\pm$ 38      | 15.51          | 1.47    |
| 300                            | 12284 $\pm$ 129    | 52.67          | 1.05    | 13156 $\pm$ 149    | 60.84          | 1.13    |
| 500                            | 20824 $\pm$ 168    | 68.59          | 0.80    | 21322 $\pm$ 188    | 76.76          | 0.88    |

**Table S4.** Results of robustness evaluation for reversed-phase HPTLC technique (mean  $\pm$  SD; n = 6).

| Conc. (ng band <sup>-1</sup> ) | Mobile phase composition (ethanol/water) |       | Results |                 |       |                |
|--------------------------------|------------------------------------------|-------|---------|-----------------|-------|----------------|
|                                | Original                                 | Used  |         | Area $\pm$ SD   | % RSD | R <sub>f</sub> |
| 300                            | 80:20                                    | 82:18 | +0.2    | 14134 $\pm$ 162 | 1.14  | 0.51           |
|                                |                                          | 80:20 | 0.0     | 13346 $\pm$ 154 | 1.15  | 0.52           |
|                                |                                          | 78:22 | -0.2    | 12356 $\pm$ 143 | 1.15  | 0.53           |

**Table S5.** Application of sustainable reversed-phase HPTLC technique in determination of PPN in commercial food products in which PPN was extracted by traditional and ultrasound procedures (mean  $\pm$  SD; n = 3).

| <b>Samples</b>                           | <b>Traditional extraction</b> | <b>Ultrasound-based extraction</b> |
|------------------------------------------|-------------------------------|------------------------------------|
| <b>Amount of PPN (mg g<sup>-1</sup>)</b> |                               |                                    |
| BPMH                                     | 133.67 $\pm$ 3.02             | 143.84 $\pm$ 3.86                  |
| BPLU                                     | 128.35 $\pm$ 2.95             | 142.29 $\pm$ 2.98                  |
| BPSH                                     | 122.46 $\pm$ 2.64             | 128.39 $\pm$ 2.70                  |
| BPPA                                     | 119.72 $\pm$ 2.52             | 125.56 $\pm$ 2.57                  |
